# Supplementary material for: SARS-CoV-2 Surveillance in Belgian Wastewaters
Source: MDPI journal article supplement (doi:10.3390/v14091950), 2022-09-02
Supplement: s1 [file s1]

# SARS-CoV-2 Surveillance in Belgian Wastewaters

## Supplementary Materials

**Table S1.** Covered population, province, region and laboratory corresponding to the wastewater treatment plants included in the national surveillance. The identification numbers (id.) are localized on the Belgian map in Figure S1.

| <b>Id.</b> | <b>Treatment Plant</b>              | <b>Population</b> | <b>Provinces</b> | <b>Region</b> | <b>Laboratory</b> |
|------------|-------------------------------------|-------------------|------------------|---------------|-------------------|
| 1          | Aalst                               | 102,800           | Oost-Vlaanderen  | Flanders      | Sciensano         |
| 2          | Aartselaar                          | 68,031            | Antwerpen        | Flanders      | UAntwerpen        |
| 3          | Amay                                | 47,038            | Liège            | Wallonia      | E-BIOM            |
| 4          | Antwerpen-Noord                     | 76,949            | Antwerpen        | Flanders      | UAntwerpen        |
| 5          | Antwerpen-Zuid                      | 215,704           | Antwerpen        | Flanders      | UAntwerpen        |
| 6          | Arlon                               | 19,440            | Luxembourg       | Wallonia      | E-BIOM            |
| 7          | Basse Wavre (Dyle)                  | 78,290            | Brabant Wallon   | Wallonia      | E-BIOM            |
| 8          | Beersel                             | 78,540            | Vlaams-Brabant   | Flanders      | Sciensano         |
| 9          | Boom <sup>1</sup>                   | 37,846            | Antwerpen        | Flanders      | UAntwerpen        |
| 10         | Brugge                              | 200,401           | West-Vlaanderen  | Flanders      | Sciensano         |
| 11         | Bruxelles-Nord/Brussel-Noord        | 1,045,863         | Brussels         | Brussels      | Sciensano         |
| 12         | Bruxelles-Sud/Brussel-Zuid          | 311,866           | Brussels         | Brussels      | Sciensano         |
| 13         | Dendermonde                         | 87,633            | Oost-Vlaanderen  | Flanders      | UAntwerpen        |
| 14         | Destelbergen                        | 63,771            | Oost-Vlaanderen  | Flanders      | Sciensano         |
| 15         | Deurne                              | 213,048           | Antwerpen        | Flanders      | UAntwerpen        |
| 16         | Froyennes                           | 34,710            | Hainaut          | Wallonia      | E-BIOM            |
| 17         | Genk                                | 73,364            | Limburg          | Flanders      | UAntwerpen        |
| 18         | Gent                                | 247,550           | Oost-Vlaanderen  | Flanders      | Sciensano         |
| 19         | Grimbergen                          | 120,627           | Vlaams-Brabant   | Flanders      | Sciensano         |
| 20         | Harelbeke                           | 125,230           | West-Vlaanderen  | Flanders      | Sciensano         |
| 21         | Hasselt                             | 81,988            | Limburg          | Flanders      | UAntwerpen        |
| 22         | Houthalen-Centrum                   | 22,357            | Limburg          | Flanders      | UAntwerpen        |
| 23         | Leuven                              | 137,365           | Vlaams-Brabant   | Flanders      | Sciensano         |
| 24         | Liedekerke                          | 112,933           | Vlaams-Brabant   | Flanders      | Sciensano         |
| 25         | Liège (Grosses Battes) <sup>2</sup> | 27,934            | Liège            | Wallonia      | E-BIOM            |
| 26         | Liège Oupeye                        | 253,780           | Liège            | Wallonia      | E-BIOM            |
| 27         | Liège Sclessin                      | 142,239           | Liège            | Wallonia      | E-BIOM            |
| 28         | Marche-en-Famenne                   | 8,633             | Luxembourg       | Wallonia      | E-BIOM            |
| 29         | Marchienne-au-Pont                  | 52,017            | Hainaut          | Wallonia      | E-BIOM            |
| 30         | Mechelen-Noord                      | 116,363           | Antwerpen        | Flanders      | UAntwerpen        |
| 31         | Menen                               | 70,041            | West-Vlaanderen  | Flanders      | Sciensano         |
| 32         | Montignies-sur-Sambre               | 123,576           | Hainaut          | Wallonia      | E-BIOM            |
| 33         | Mornimont                           | 34,140            | Namur            | Wallonia      | E-BIOM            |
| 34         | Mouscron versant Espierres          | 21,179            | Hainaut          | Wallonia      | E-BIOM            |
| 35         | Namur-Brumagne                      | 82,175            | Namur            | Wallonia      | E-BIOM            |
| 36         | Oostende                            | 153,401           | West-Vlaanderen  | Flanders      | Sciensano         |

|    |                           |         |                 |          |            |
|----|---------------------------|---------|-----------------|----------|------------|
| 37 | Roeselare                 | 82,137  | West-Vlaanderen | Flanders | Sciensano  |
| 38 | Sint-Niklaas              | 55,038  | Oost-Vlaanderen | Flanders | UAntwerpen |
| 39 | Soumagne <sup>3</sup>     | 7,955   | Liège           | Wallonia | E-BIOM     |
| 40 | Tessenderlo               | 55,546  | Limburg         | Flanders | UAntwerpen |
| 41 | Turnhout                  | 44,524  | Antwerpen       | Flanders | UAntwerpen |
| 42 | Vallee du Hain (l'Orchis) | 57,050  | Brabant Wallon  | Wallonia | E-BIOM     |
| 43 | Wasmuel                   | 157,342 | Hainaut         | Wallonia | E-BIOM     |
| 44 | Wegnez <sup>2</sup>       | 78,244  | Liège           | Wallonia | E-BIOM     |

<sup>1</sup> The sampling in Boom was interrupted and replaced by Tessenderlo on 01/01/2021. <sup>2</sup> The sampling of Wegnez and Liège (Grosses Battes) was interrupted in July 2021 as major flooding events damaged the treatment plants. <sup>3</sup> The sampling of Soumagne started on 24/08/2021.

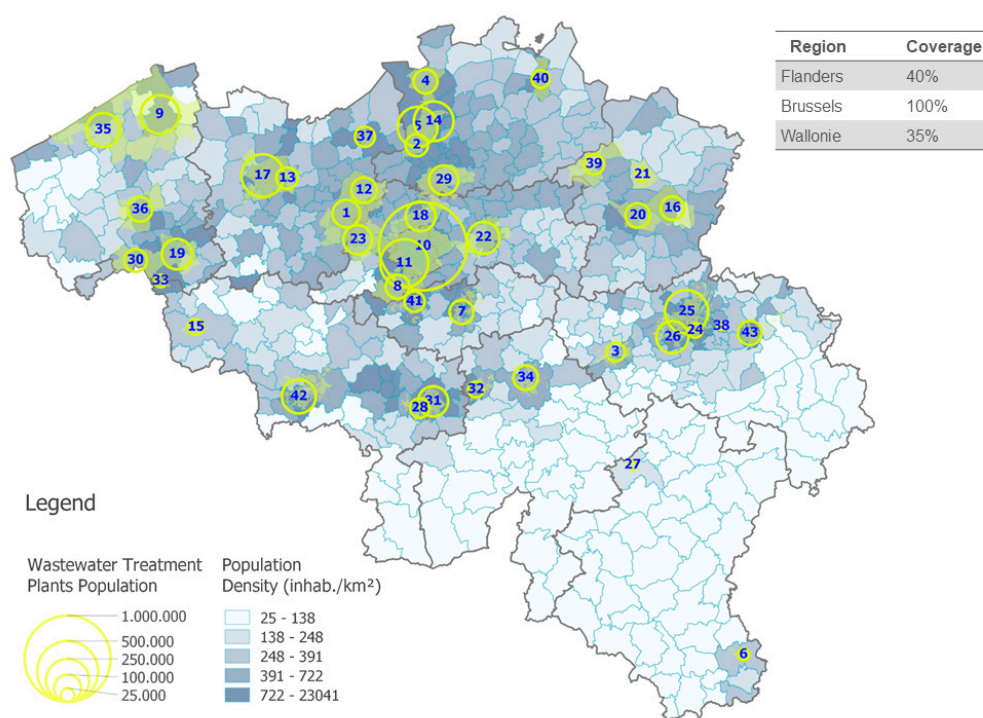

**Figure S1.** The localization of the treatment plants included in the wastewater surveillance and their identification number as described in Table S1. The population located in the areas covered by the wastewater treatment plants are highlighted in yellow and the population density for each municipality is indicated with the blue scale.

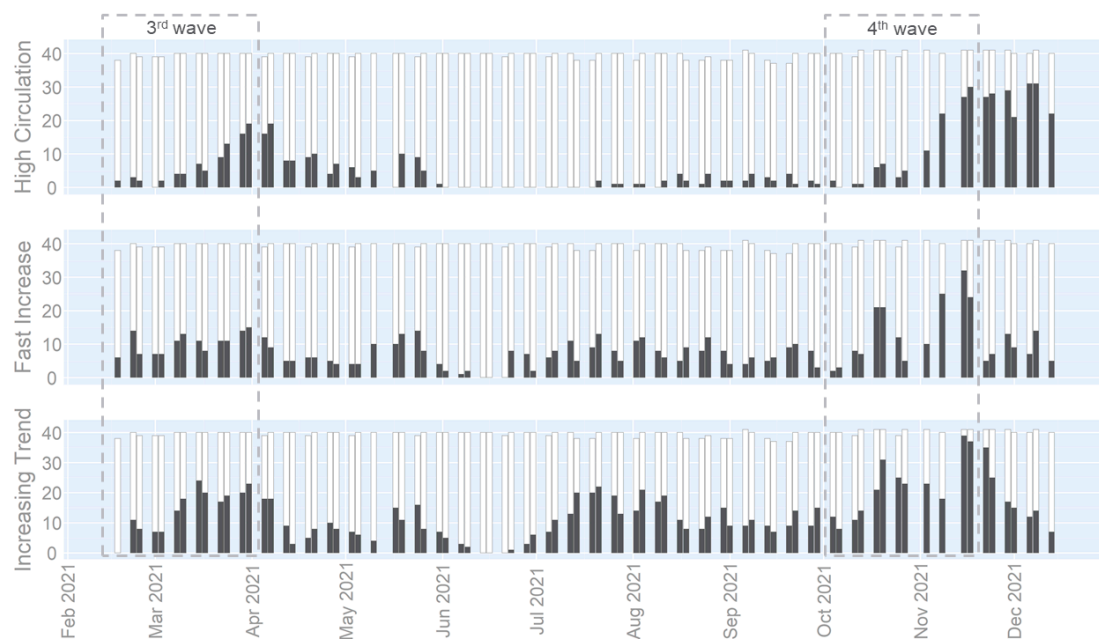

**Figure S2.** Evolution of the number of areas for which the wastewater indicators are positives. The indicators are computed on the viral load per capita (SARS-CoV-2 RNA copies/day/100 k inhab.) with the 3rd wave as reference period (15/02/2021–01/04/2021): High Circulation, Fast Increase, and Increasing Trend. The number of areas for which each indicator is positive or not is indicated by black and white bars, respectively. The total number may be lower than 42 when technical issues prevented samples to be taken for some of the wastewater treatment plants.

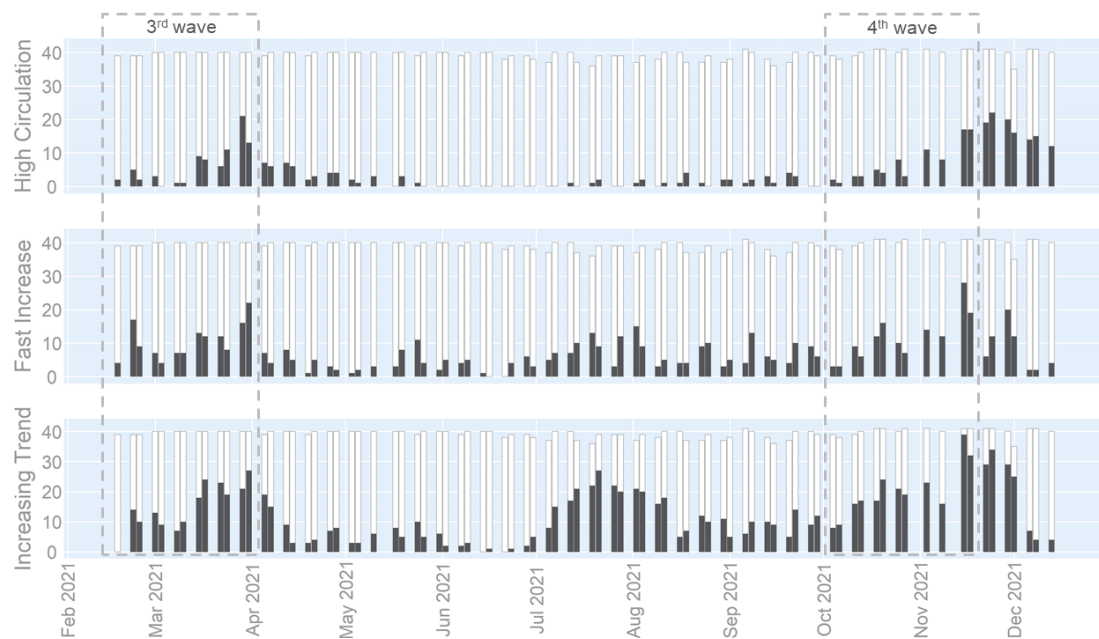

**Figure S3.** Evolution of the number of areas for which the wastewater indicators are positives. The indicators are computed on the viral to faecal ratio (SARS-CoV-2 RNA gene copies/PMMoV RNA gene copies) with the 3rd wave as reference period (15/02/2021–01/04/2021): High Circulation, Fast Increase, and Increasing Trend. The number of areas for which each indicator is positive or not is indicated by black and white bars, respectively. The total number may be lower than 42 when technical issues prevented samples to be taken for some of the wastewater treatment plants.

**Table S2.** Spearman correlation coefficients computed for the three combinations of viral concentration of targeted SARS-CoV-2 gene fragments (N1 vs. N2, N1 vs. E, N2 vs. E) grouped by month between February 2021 and December 2021. The number (N) of viral concentration measurements

included in the analysis is shown. Data of the 42 treatment plants were used and were, thus, not aggregated at a national level. All correlations were significant ( $p < 0.0001$ ).

| Month          | N   | N1 vs. N2 | N1 vs. E | N2 vs. E |
|----------------|-----|-----------|----------|----------|
| March 2021     | 400 | 0.93      | 0.86     | 0.85     |
| April 2021     | 318 | 0.95      | 0.80     | 0.89     |
| May 2021       | 319 | 0.93      | 0.87     | 0.87     |
| June 2021      | 360 | 0.92      | 0.88     | 0.83     |
| July 2021      | 315 | 0.96      | 0.87     | 0.90     |
| August 2021    | 351 | 0.96      | 0.91     | 0.91     |
| September 2021 | 339 | 0.98      | 0.95     | 0.95     |
| October 2021   | 323 | 0.98      | 0.94     | 0.95     |
| November 2021  | 286 | 0.97      | 0.89     | 0.92     |
| December 2021  | 162 | 0.98      | 0.89     | 0.88     |
